# Supplementary material for: Control over the morphology and segregation of Zebrafish germ cell granules during embryonic development
Source: PubMed Central journal article supplement (PMC2441585; doi:10.1186/1471-213x-8-58), 2008-05-28

*nanos*

*vasa*

3 somite

20-22 hpf

3 somite

20-22 hpf

cnt Mo

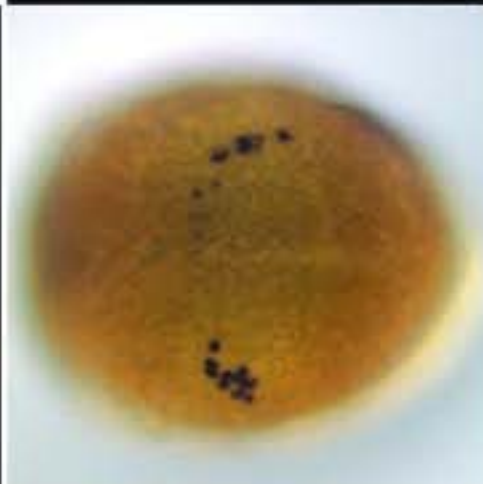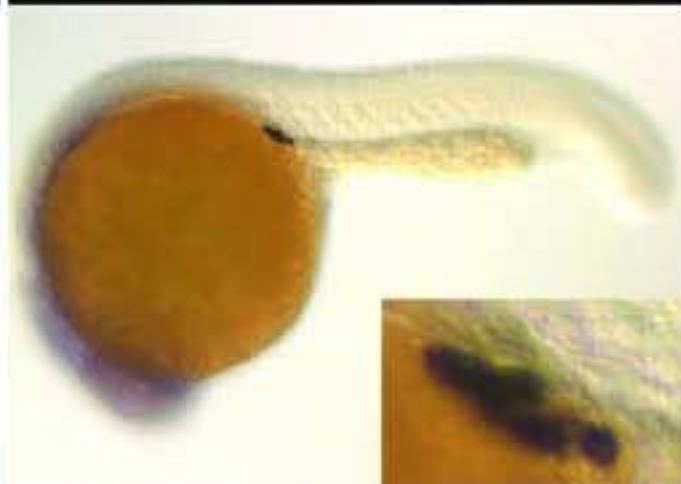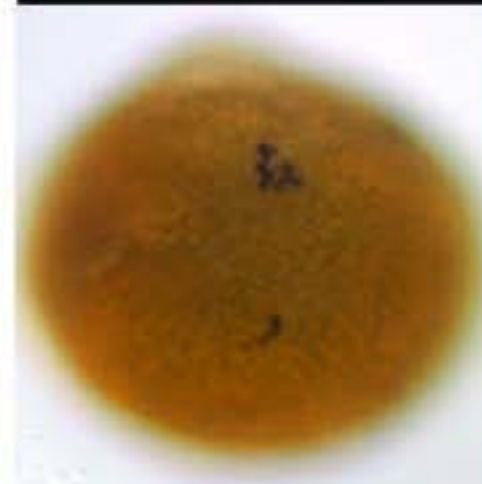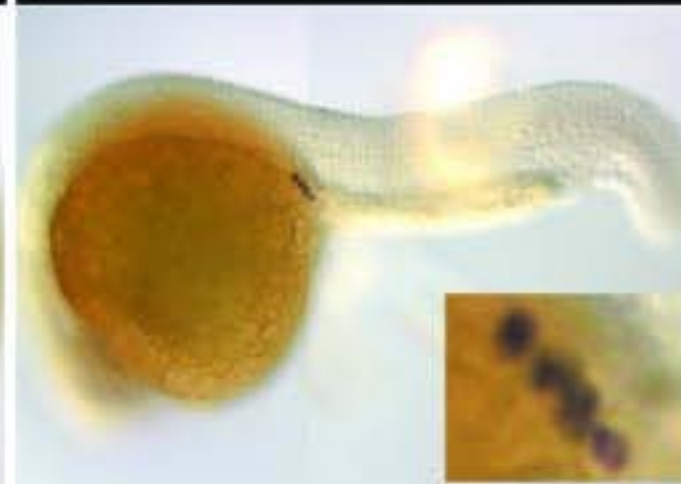

TDRD7 Mo

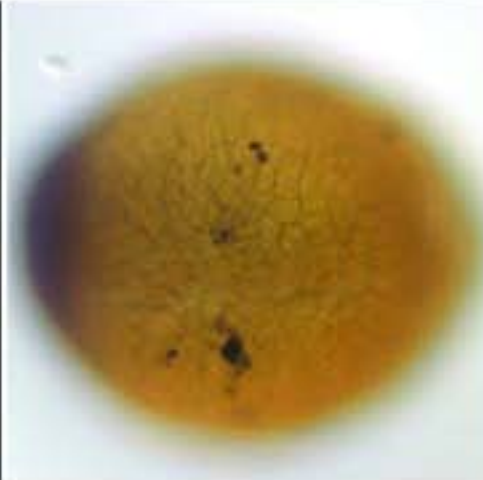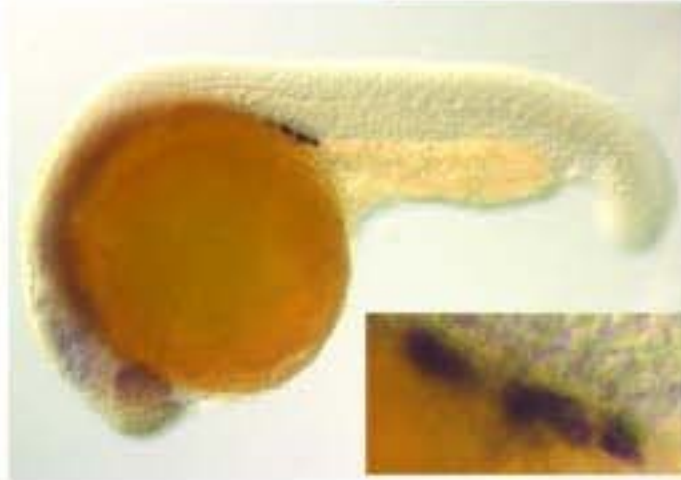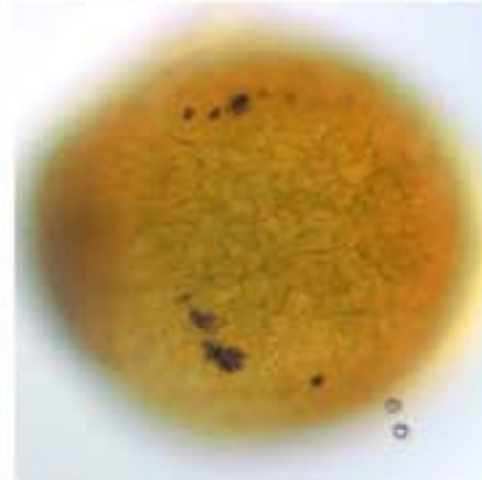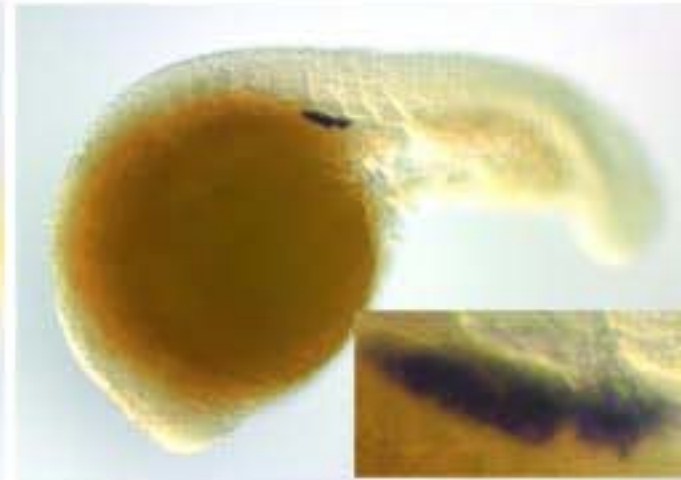

*dead end*

*h1m*

3 somite

20-22 hpf

3 somite

20-22 hpf

cnt Mo

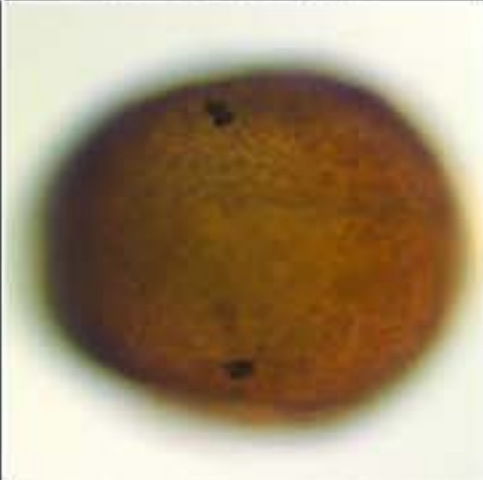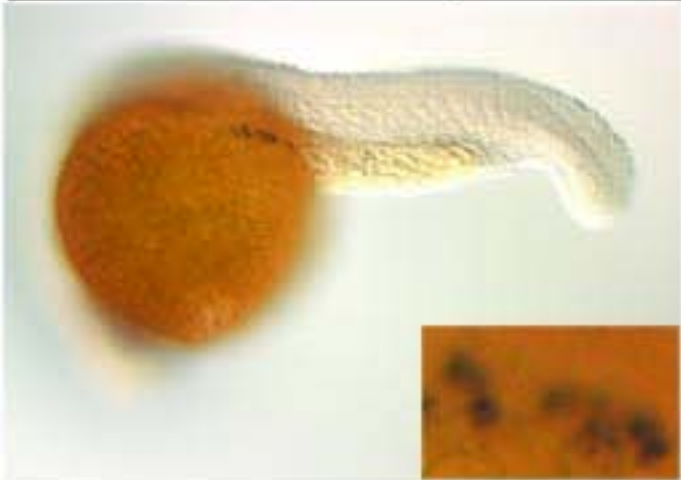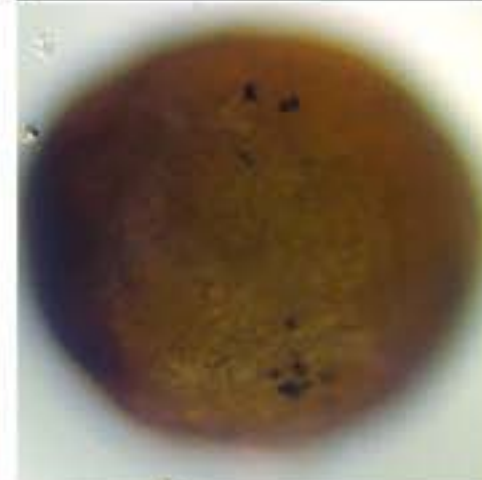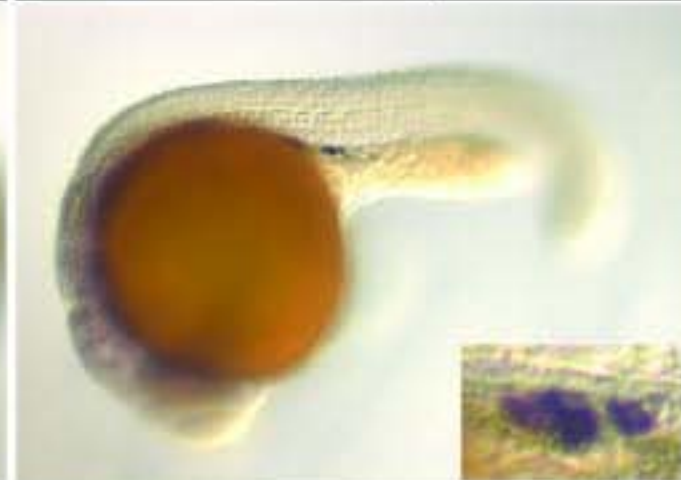

TDRD7 Mo

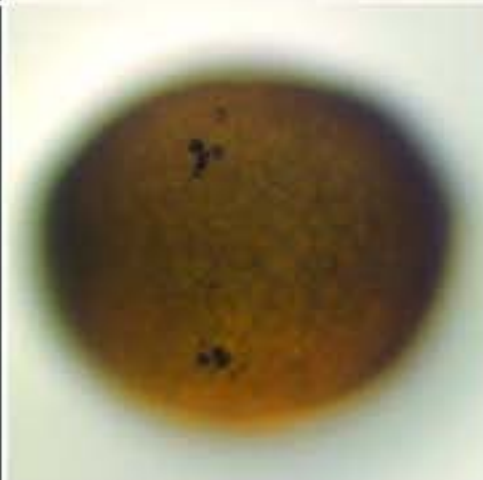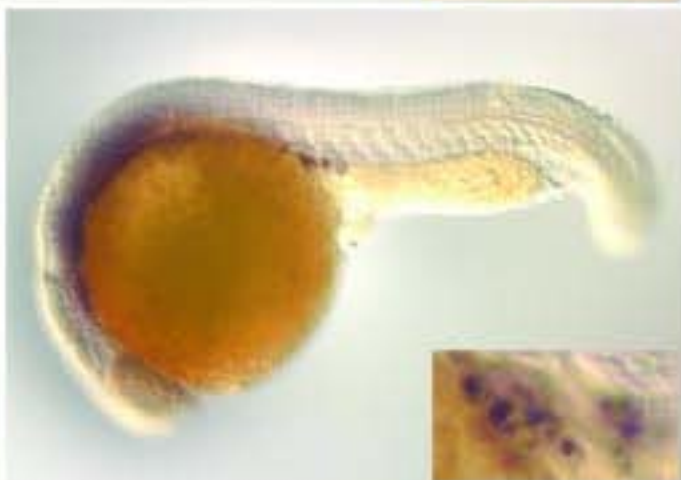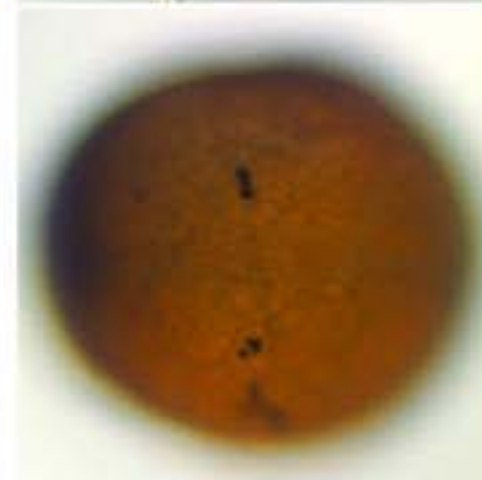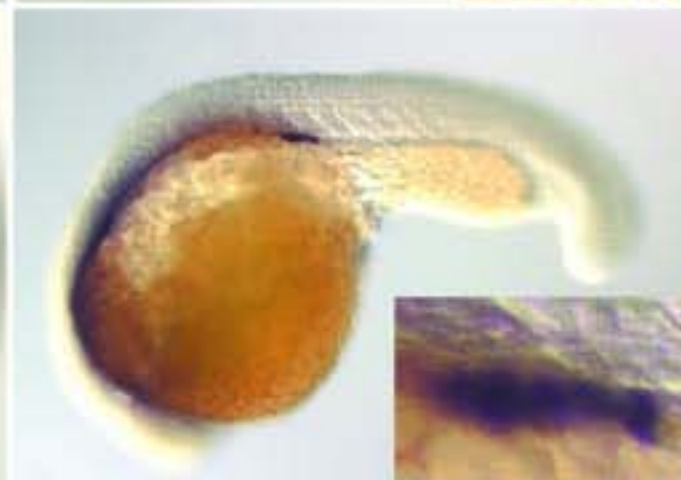

cnt Mo (60 hpf)

TDRD7 Mo (60 hpf)

ziwi

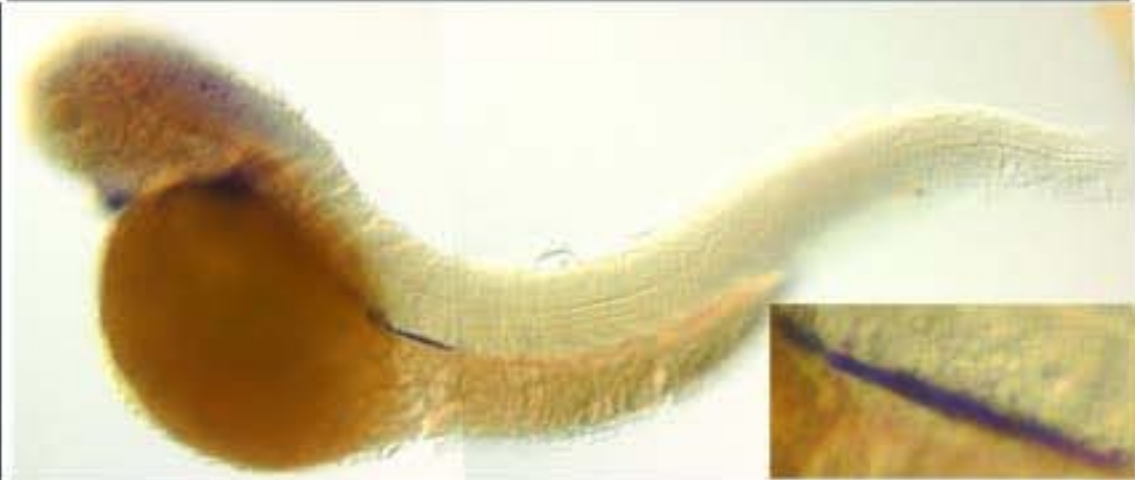

ziwi

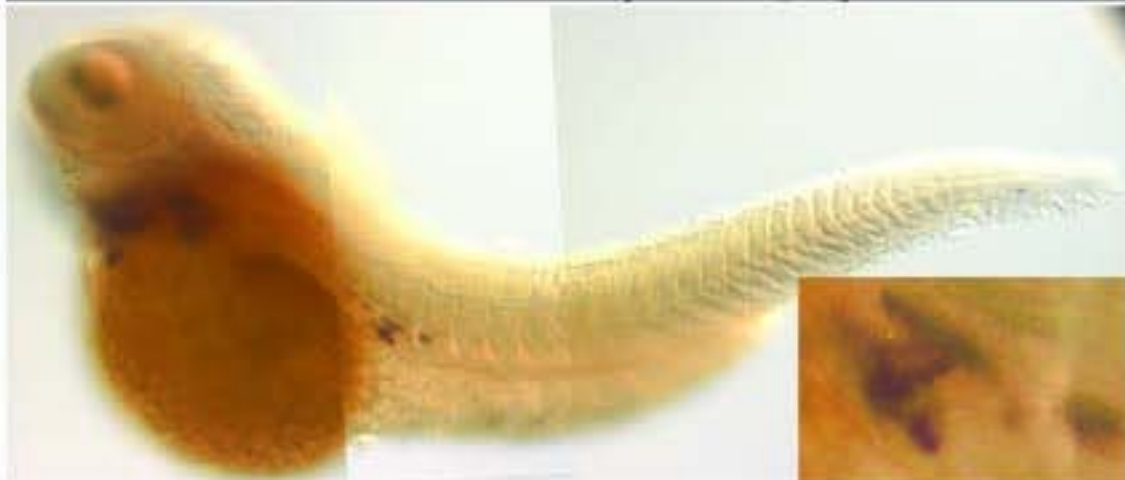

Supplement: 1471-213X-8-58-S7.pdf [file 1471-213X-8-58-S7.pdf]
