# Supplementary material for: Control over the morphology and segregation of Zebrafish germ cell granules during embryonic development
Source: PubMed Central journal article supplement (PMC2441585; doi:10.1186/1471-213x-8-58), 2008-05-28

*control Mo*

*granulito Mo*

**Vasa-dsRed**

10  $\mu$ M

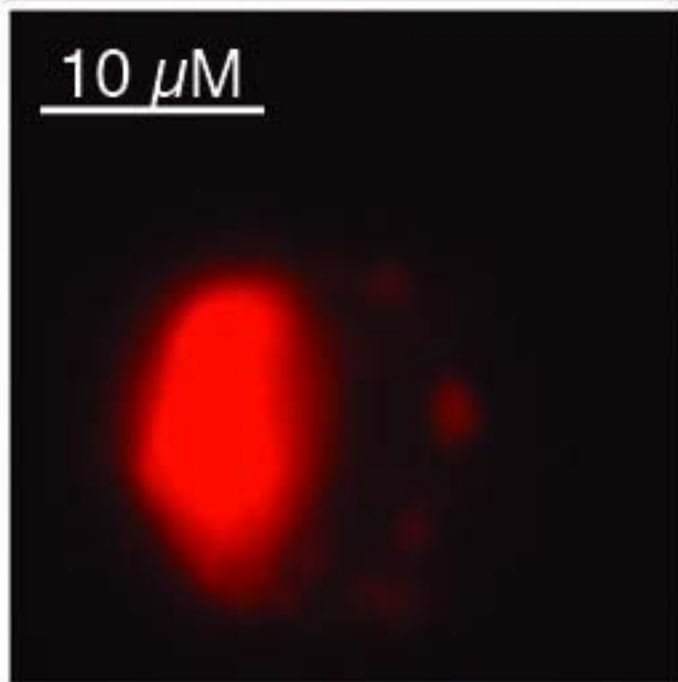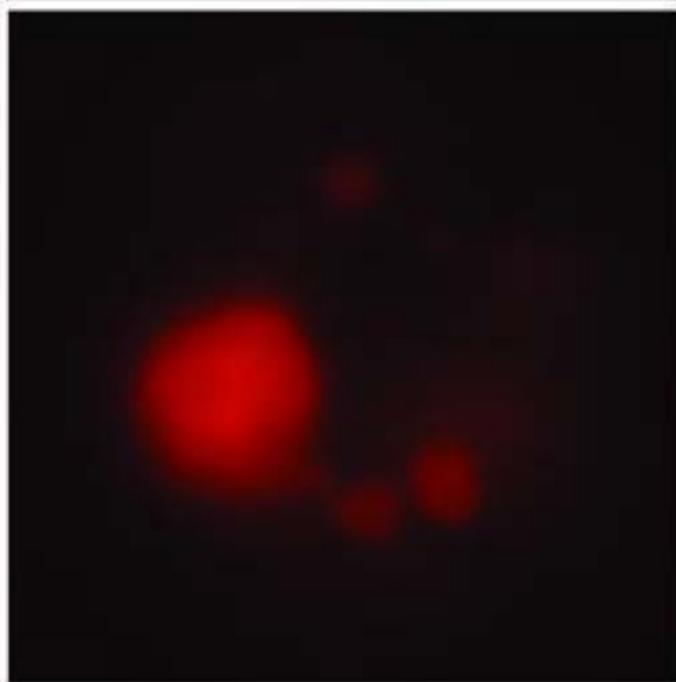

**Granulito-EYFP**

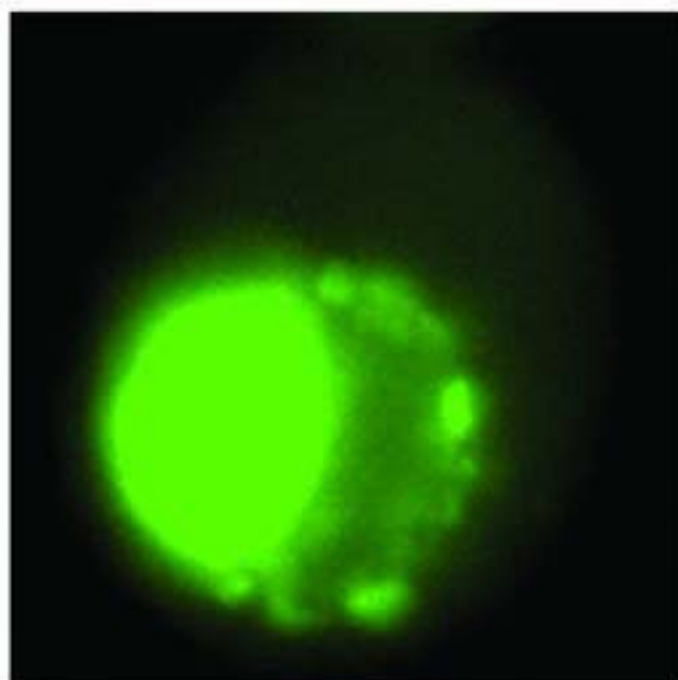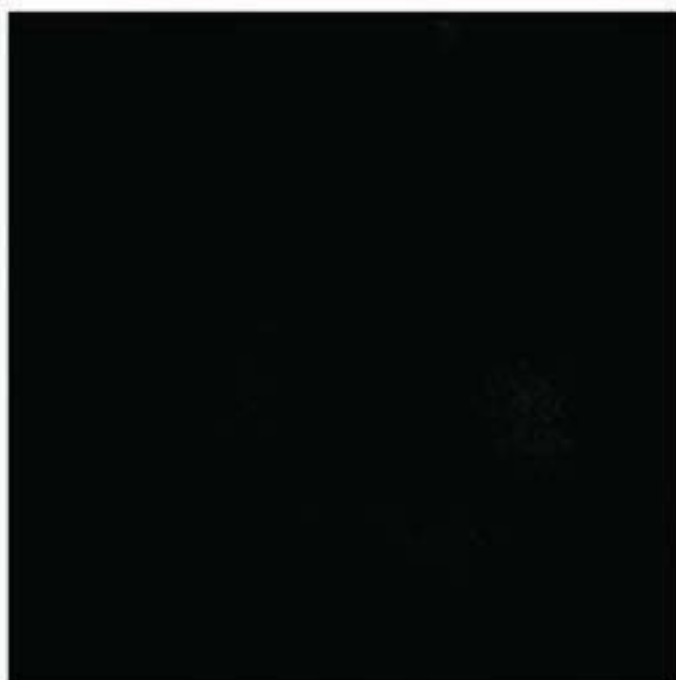

**merged**

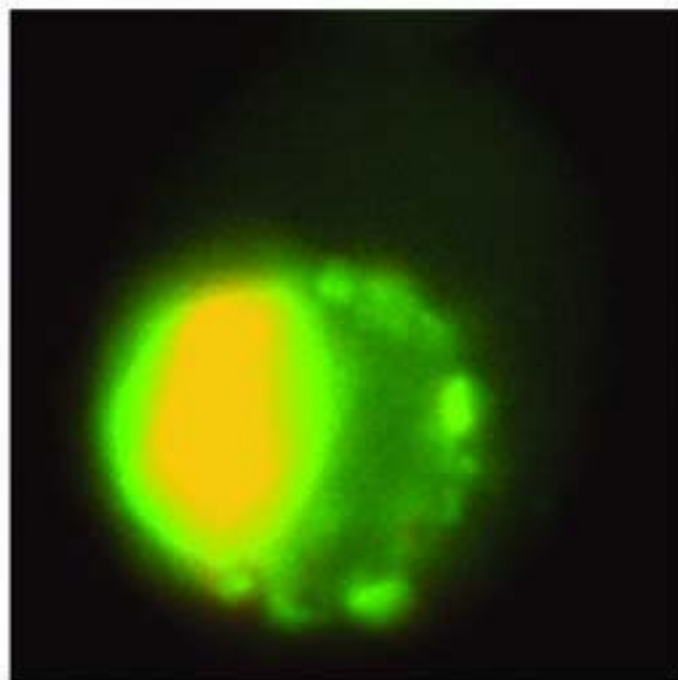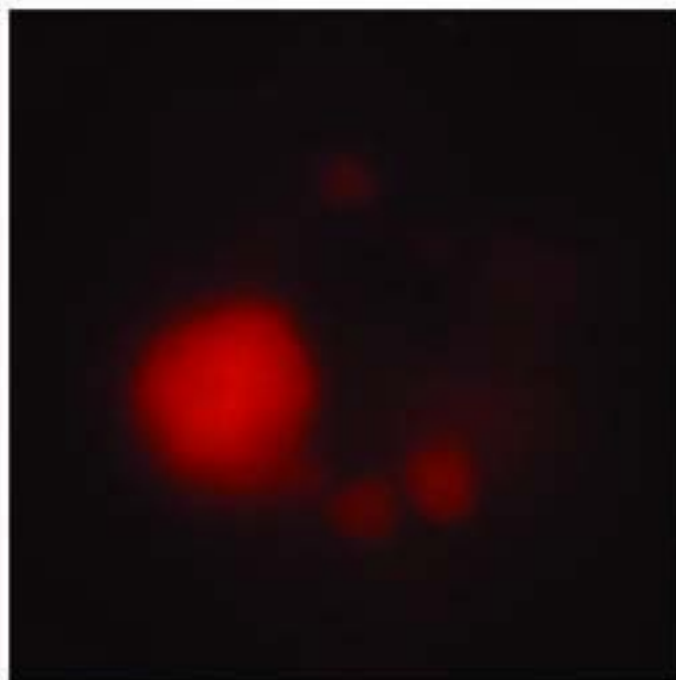

Supplement: 1471-213X-8-58-S1.pdf [file 1471-213X-8-58-S1.pdf]
