# Supplementary material for: Control over the morphology and segregation of Zebrafish germ cell granules during embryonic development
Source: PubMed Central journal article supplement (PMC2441585; doi:10.1186/1471-213x-8-58), 2008-05-28

**End of mitosis**

**Interphase**

**Nucleus-Vasa**

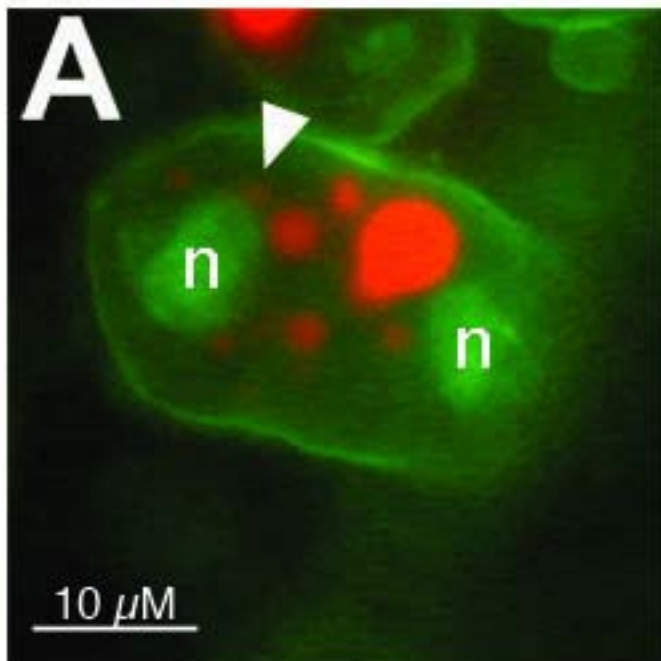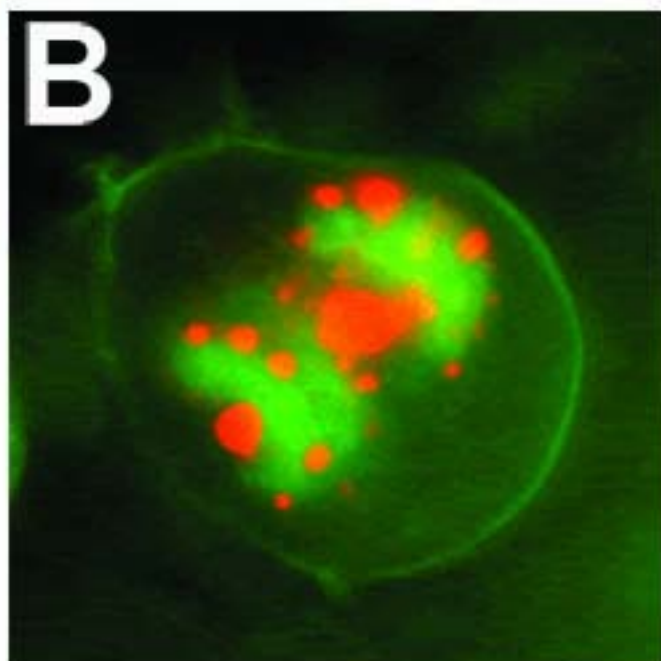

Supplement: 1471-213X-8-58-S5.pdf [file 1471-213X-8-58-S5.pdf]
